# Supplementary material for: Autophagy dictates sensitivity to PRMT5 inhibitor in breast cancer
Source: PubMed Central journal article supplement (PMC10318021; doi:10.1038/s41598-023-37706-9), 2023-07-03

Images of the original blots for Fig. 2

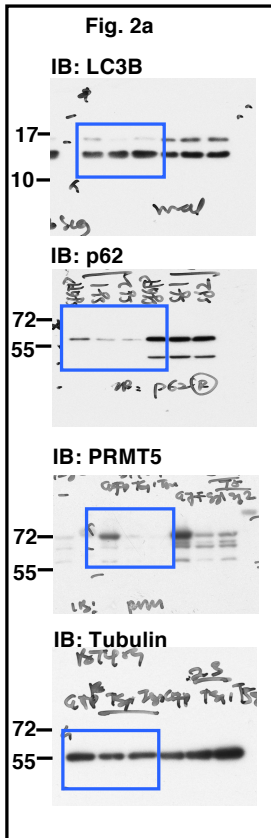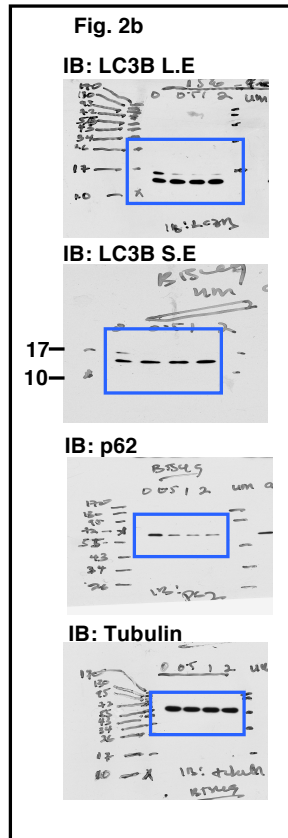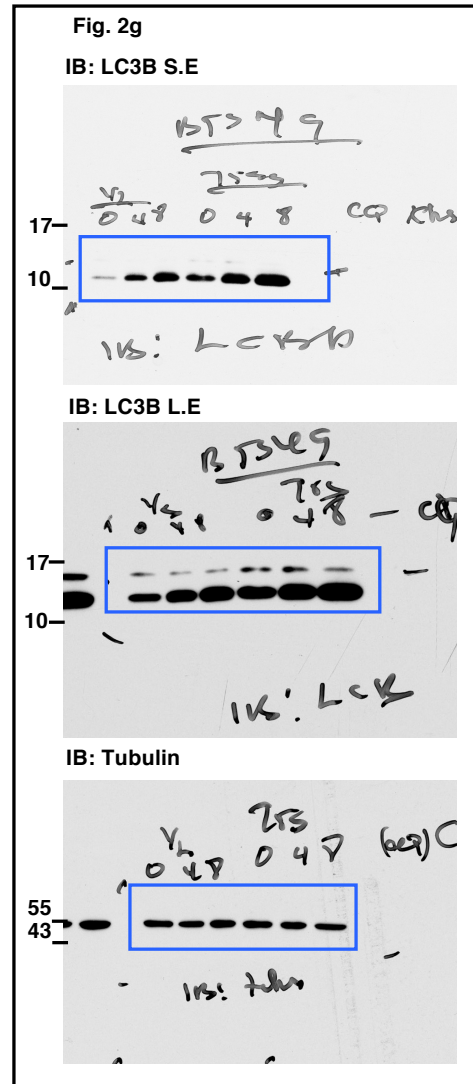

Images of the original blots for Fig. 3

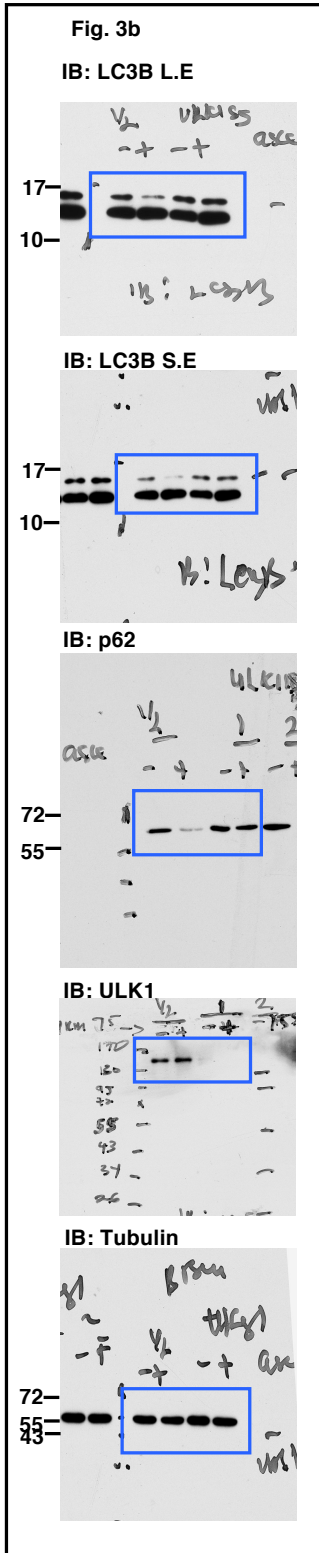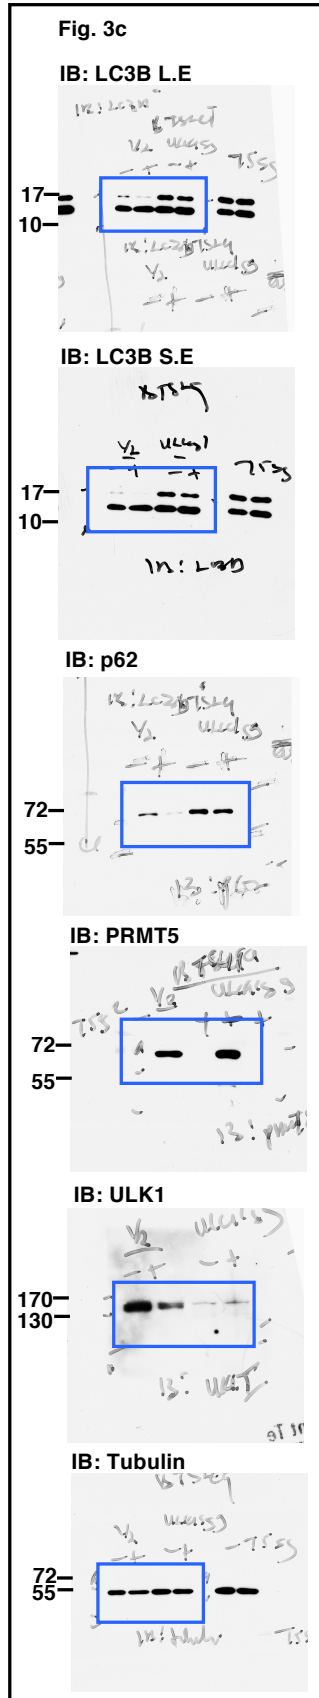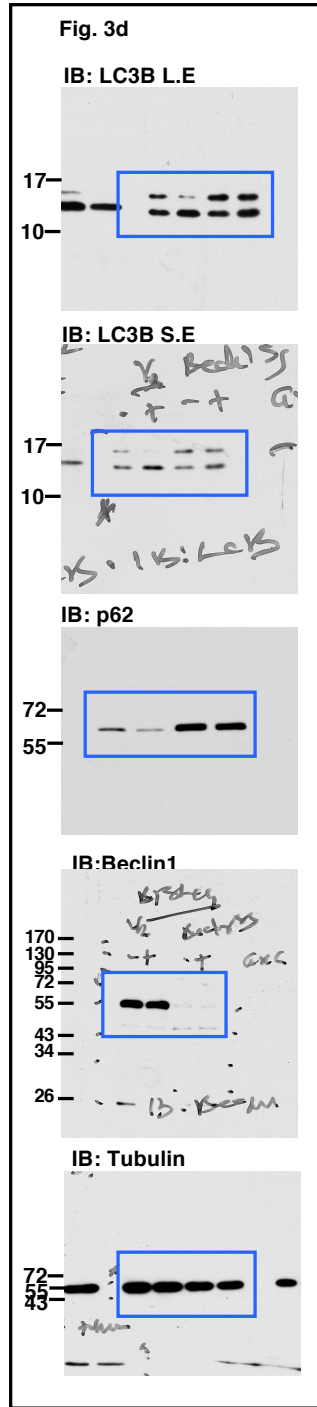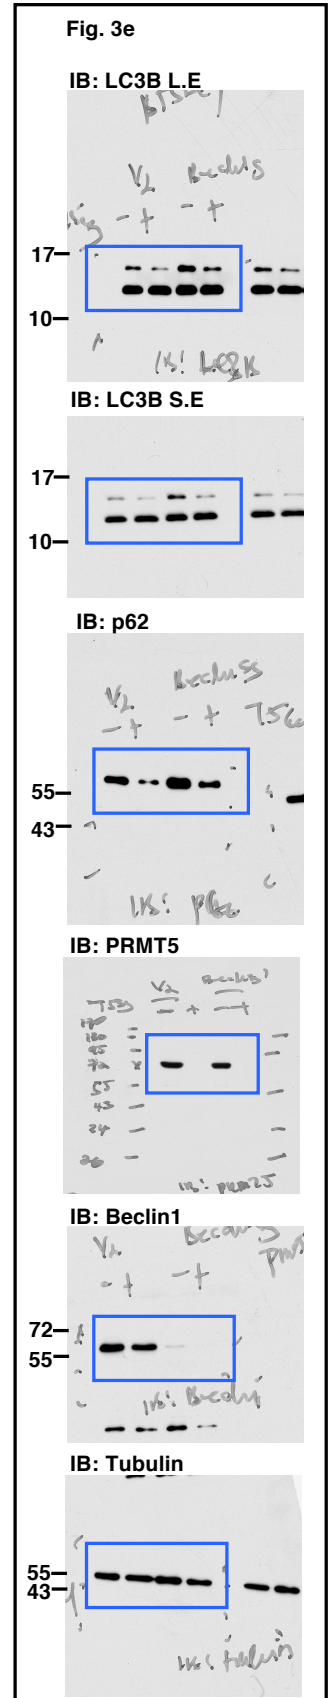

Images of the original blots for Fig. 4

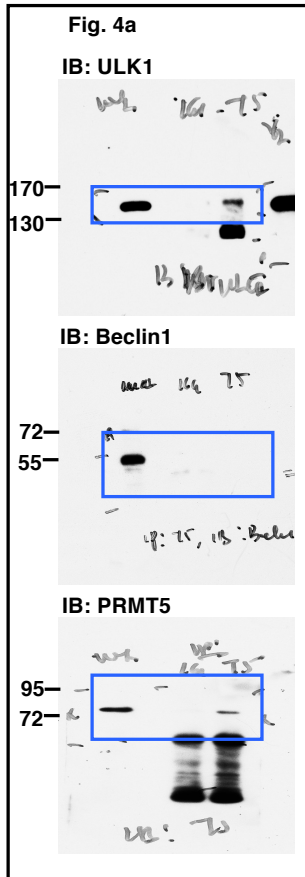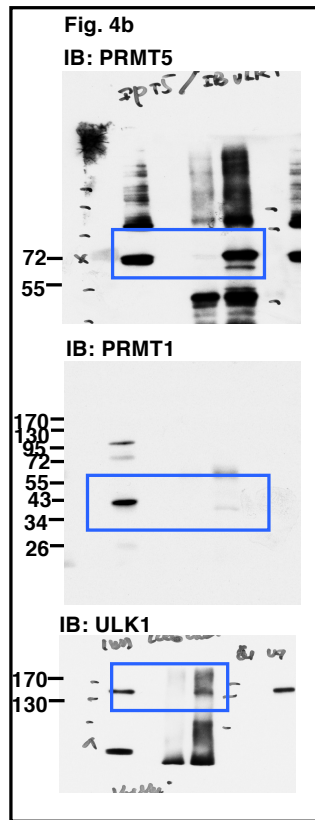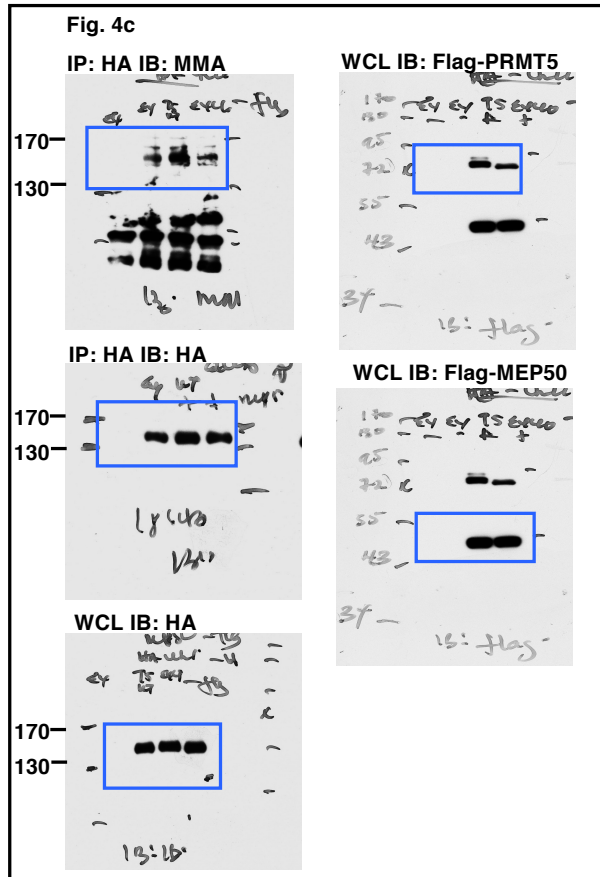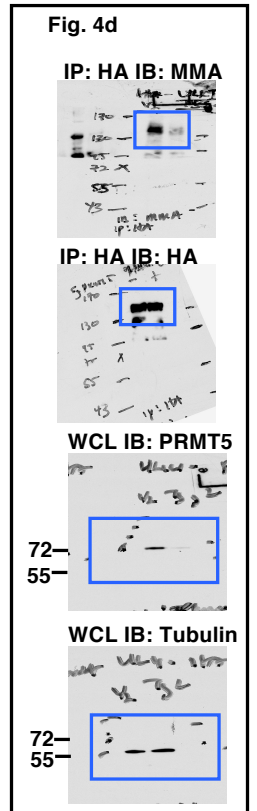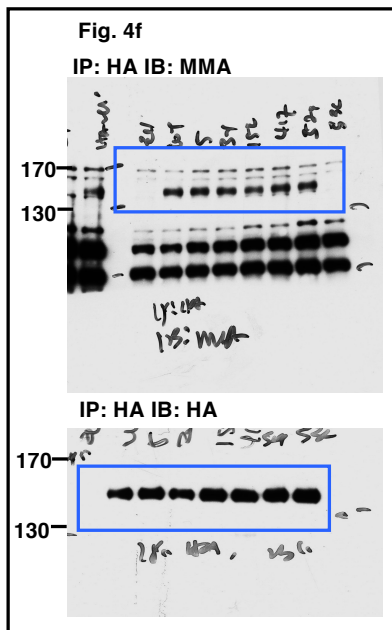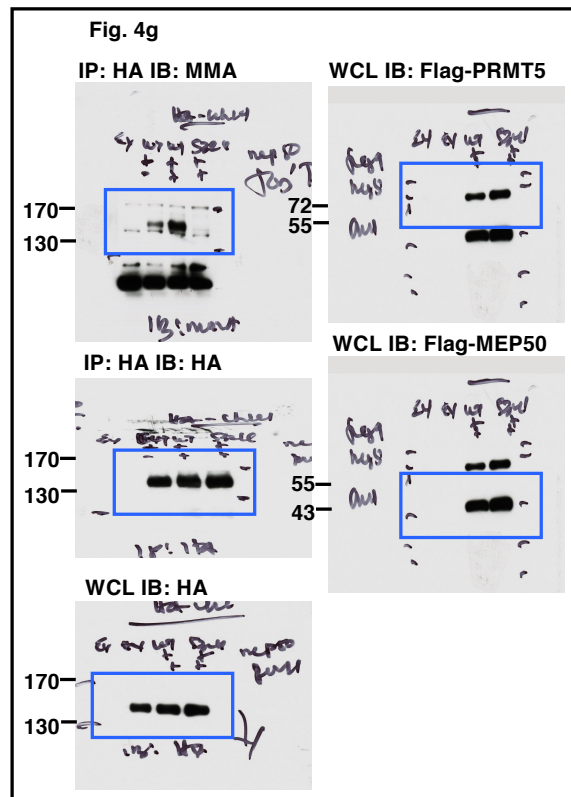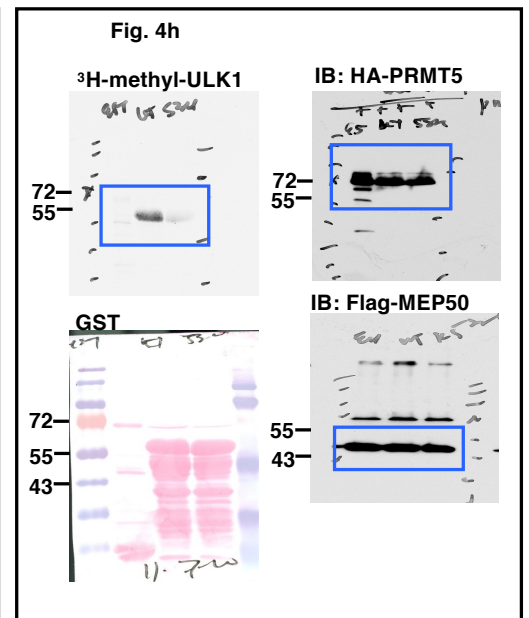

Images of the original blots for Fig. 5

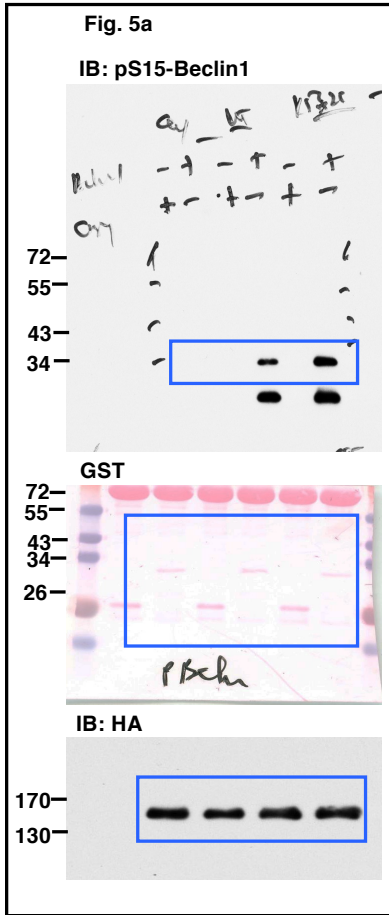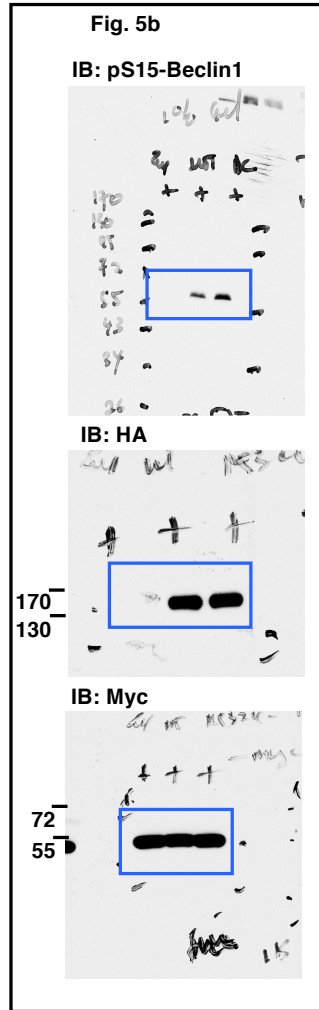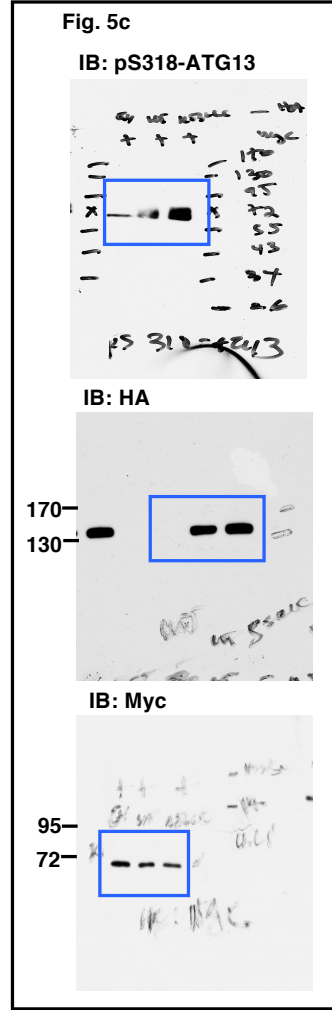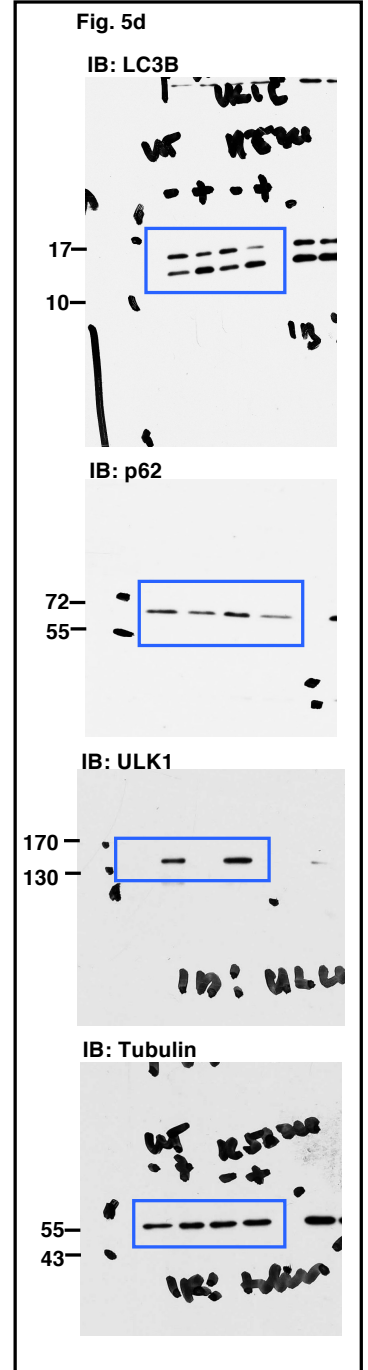

Images of the original blots for Fig. 6

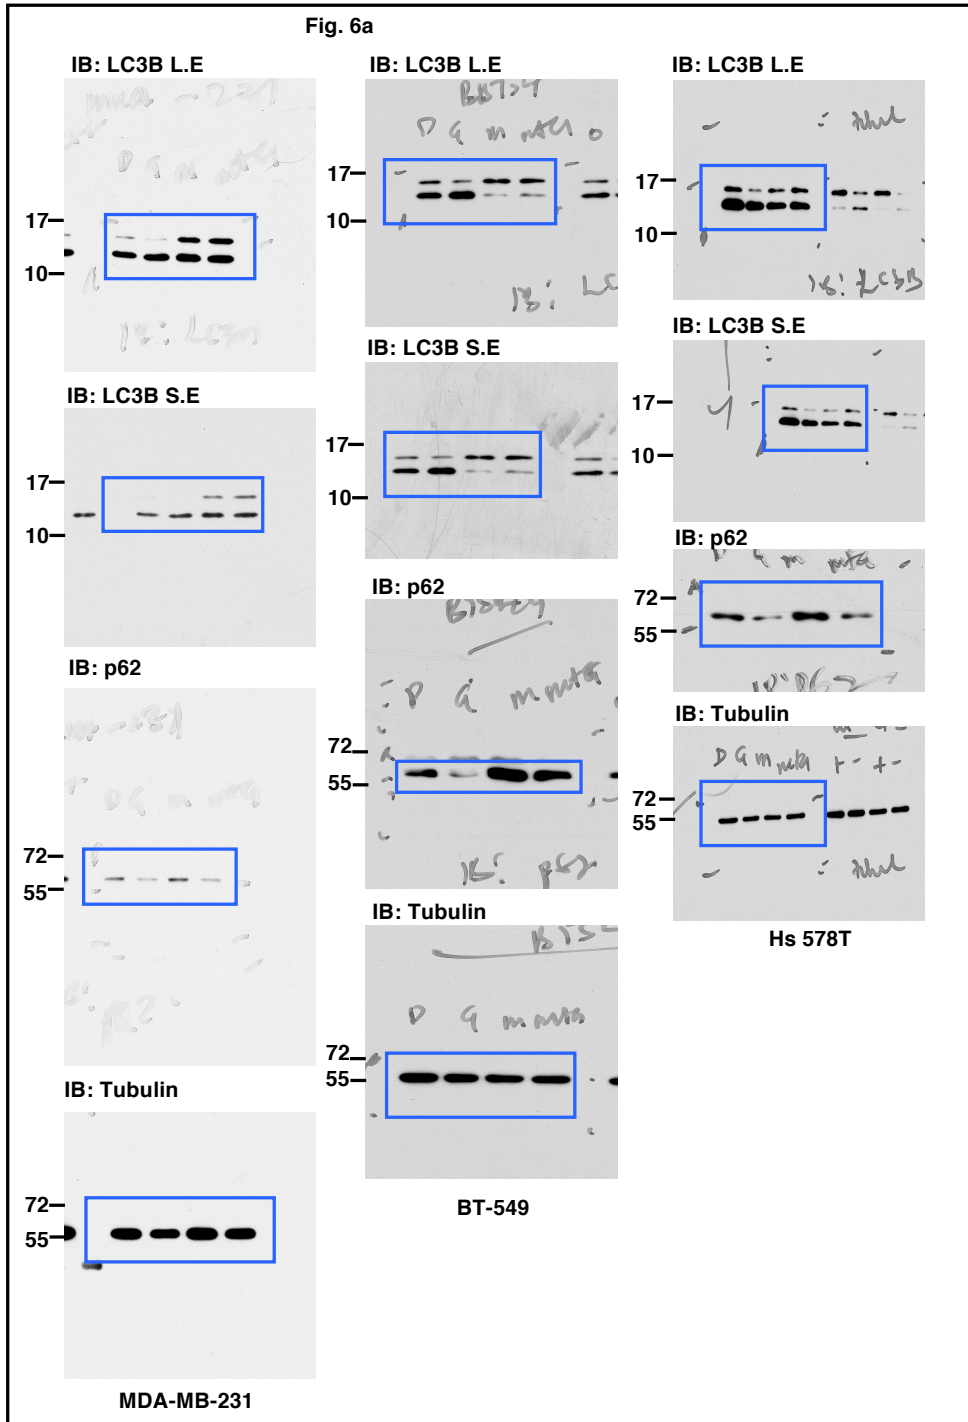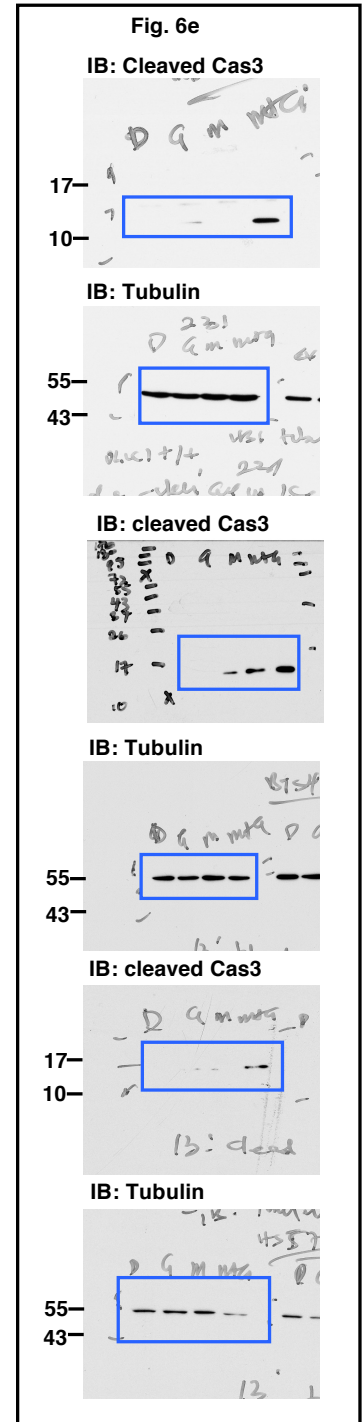

Images of the original blots for Suppl Fig. 1

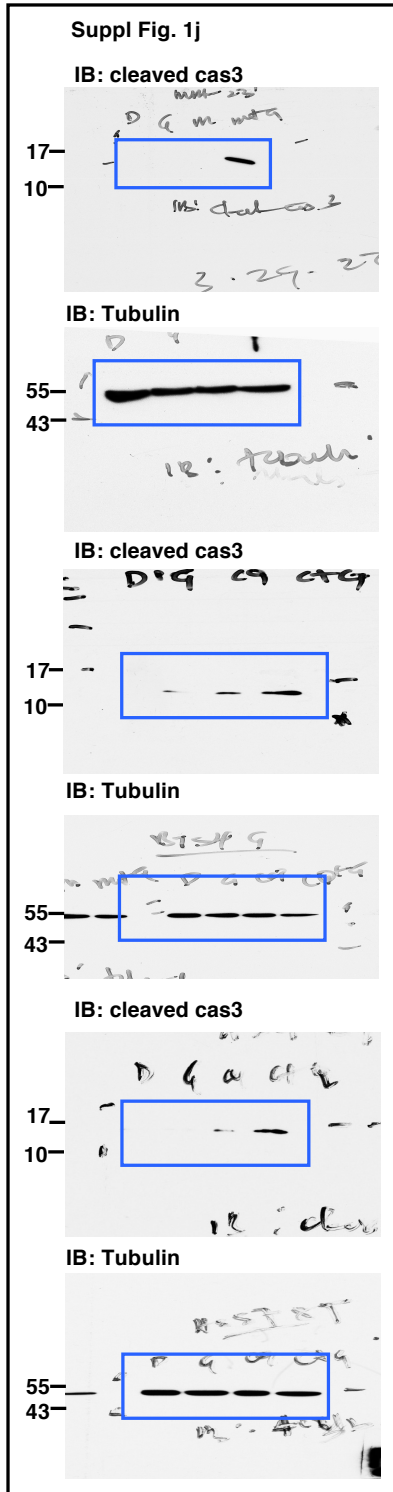

Images of the original blots for Suppl Fig. 2

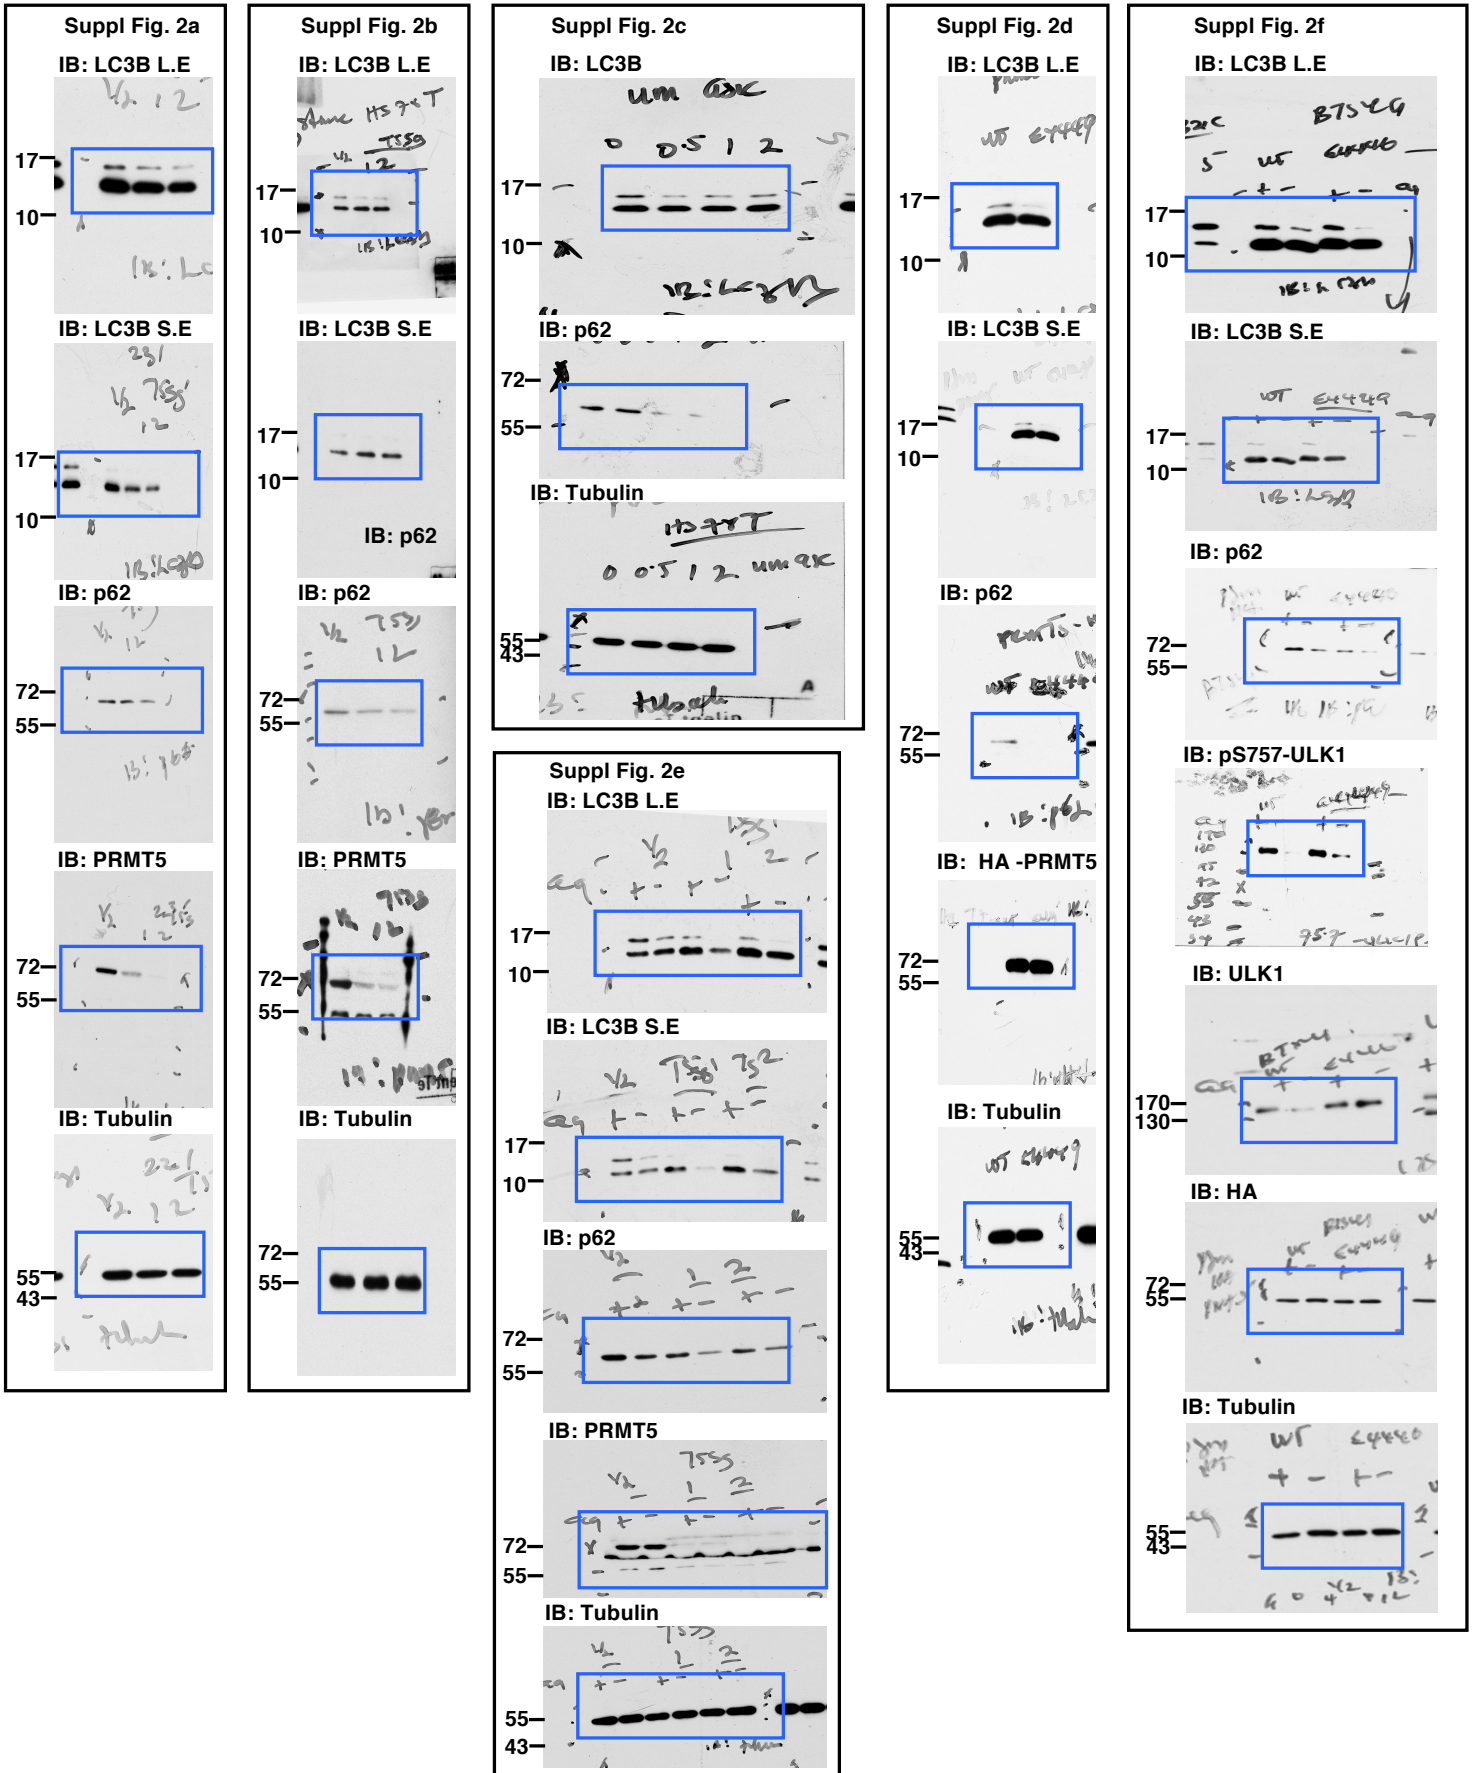

Images of the original blots for Suppl Fig. 3

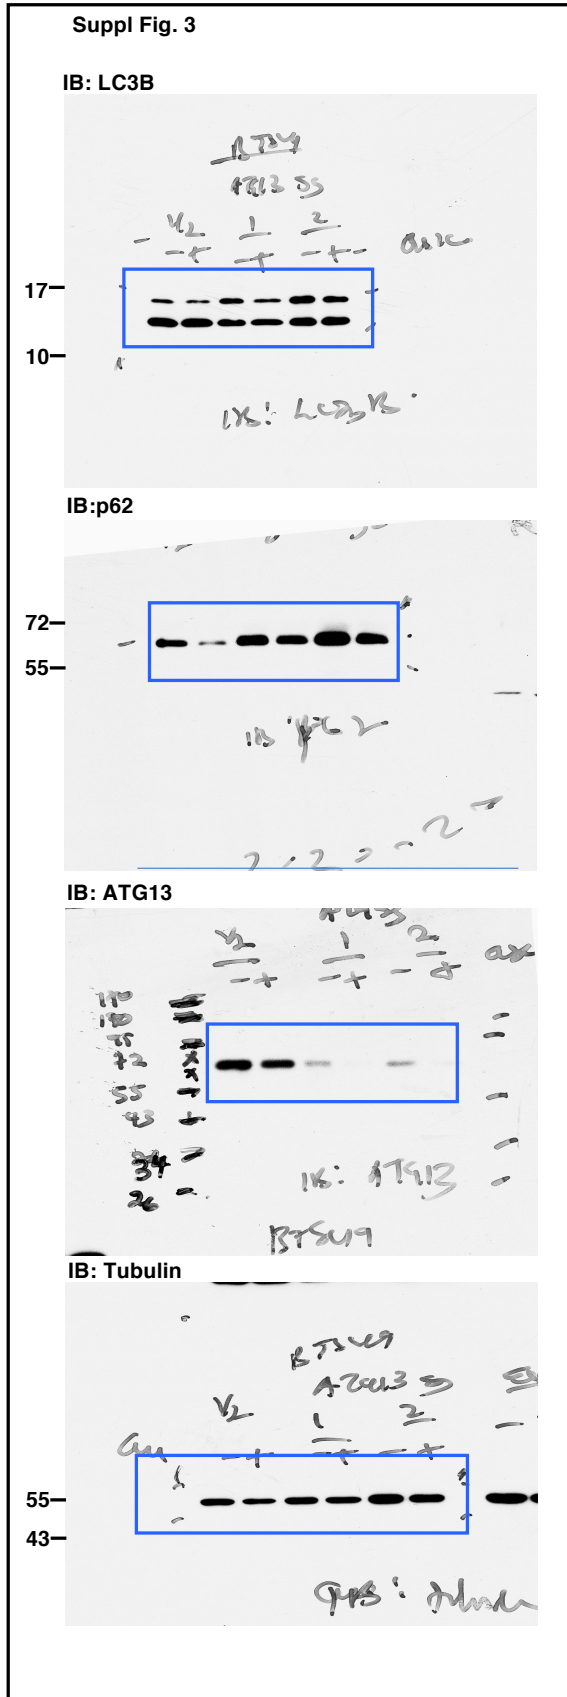



Images of the original blots for Suppl Fig. 4

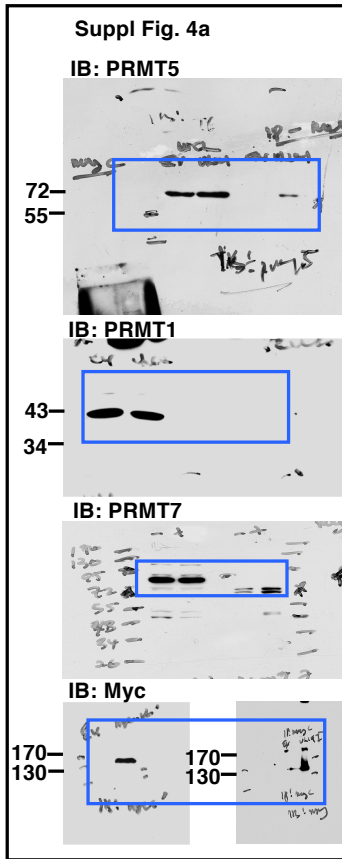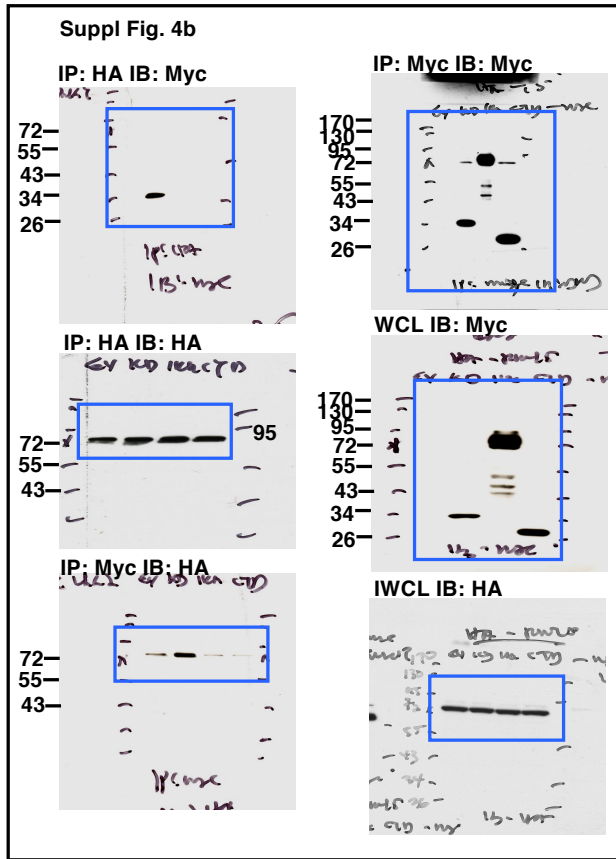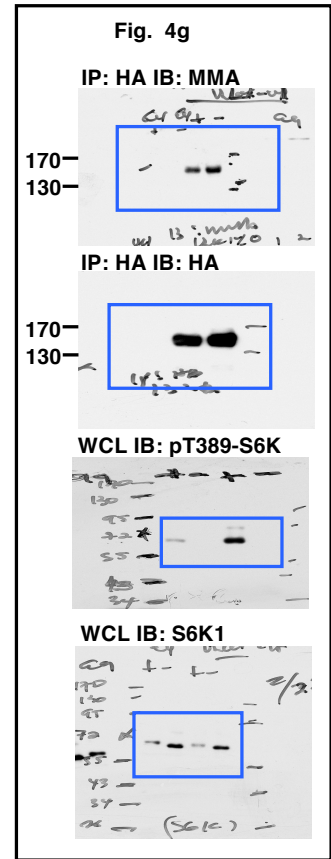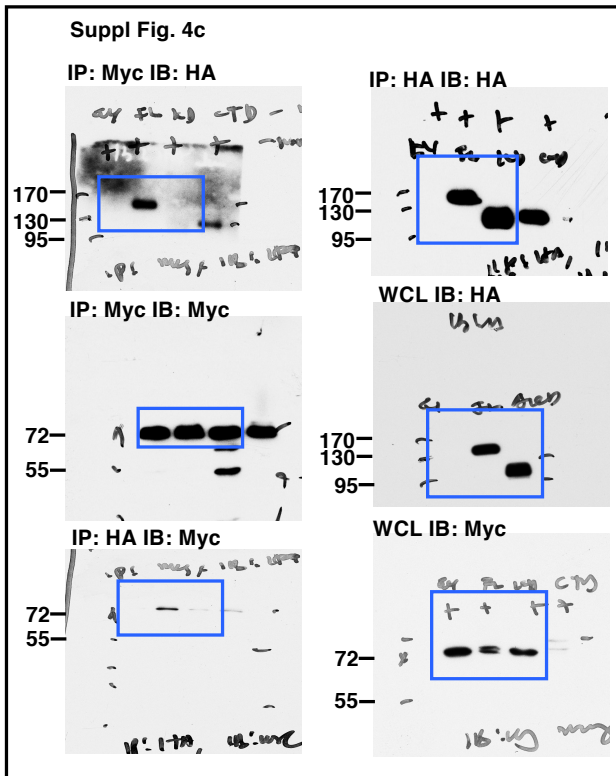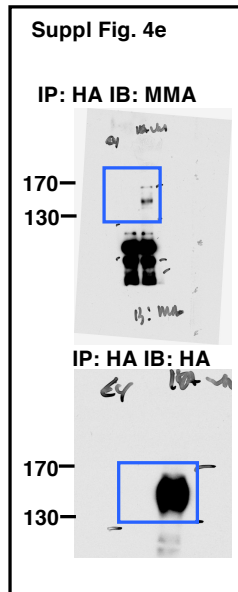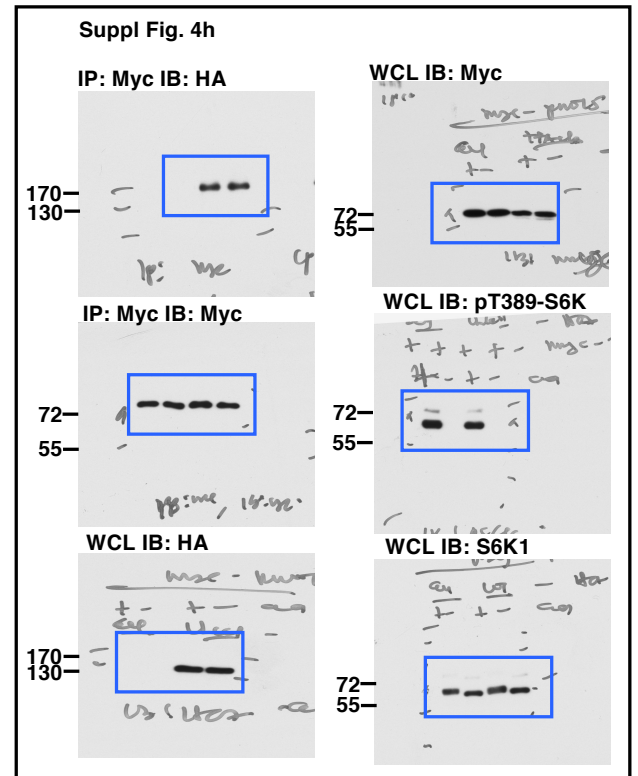

Images of the original blots for Suppl Fig. 5

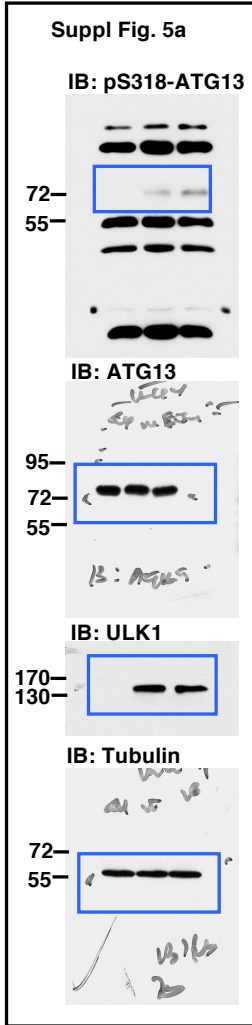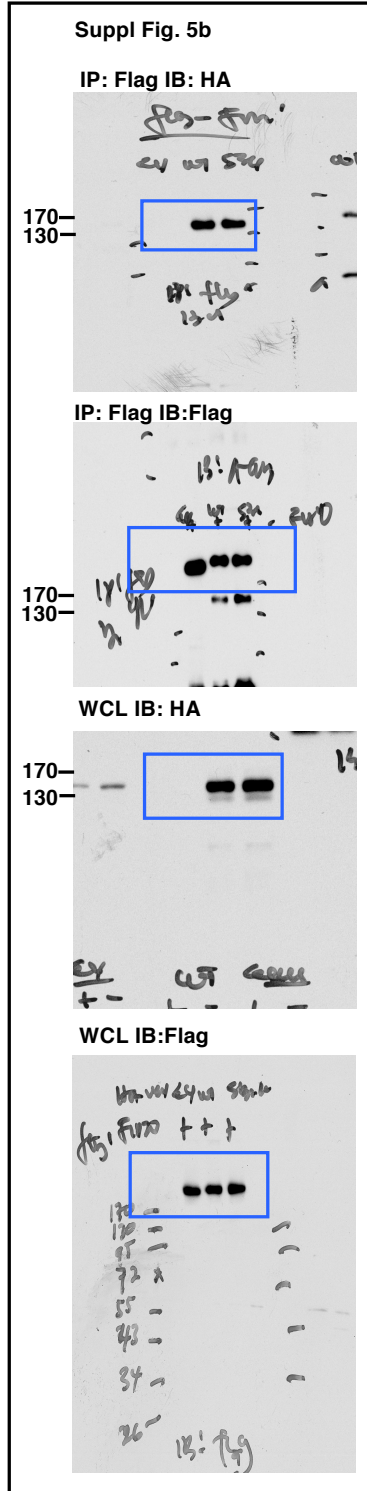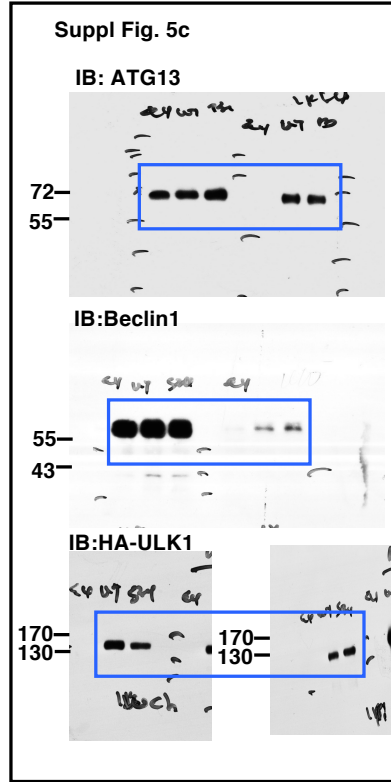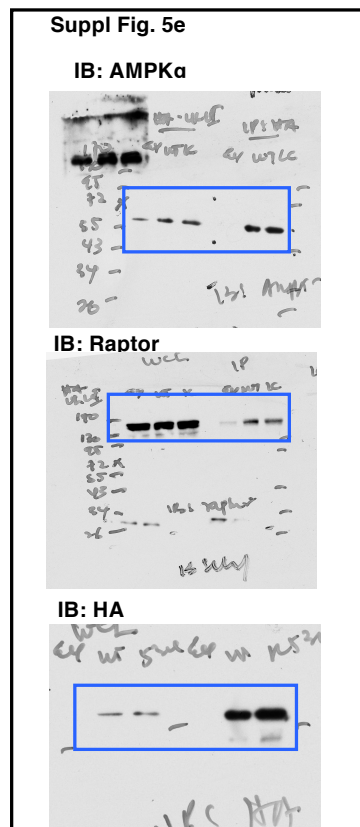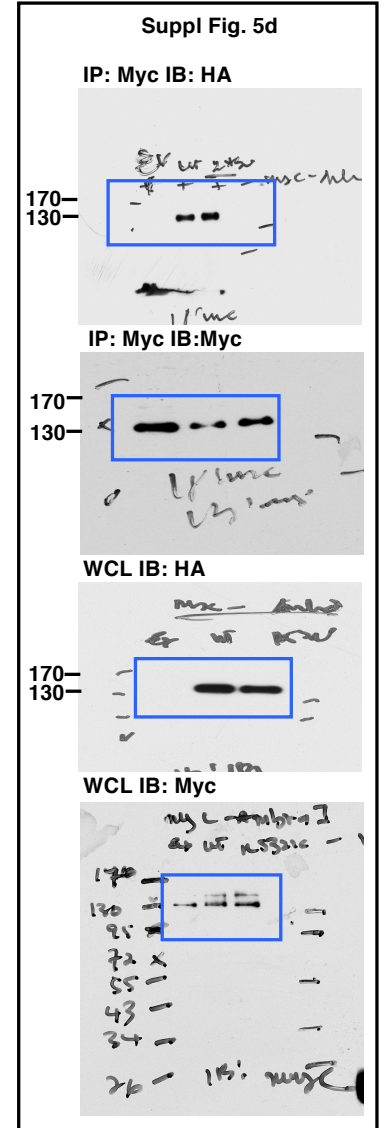

Supplement: 41598_2023_37706_MOESM1_ESM.pdf [file 41598_2023_37706_MOESM1_ESM.pdf]
